1 **Research Letter: Incidence of SARS-CoV-2 infection among unvaccinated US adults during the Omicron**  
2 **wave**

3  
4 Jennifer L. Alejo, MD<sup>1</sup>, Teresa PY Chiang, MD, MPH<sup>1</sup>, Jonathan Mitchell, MBBS<sup>1</sup>, Aura T. Abedon, BS<sup>1</sup>,  
5 Alexa A. Jefferis, BS<sup>1</sup>, William Werbel, MD<sup>1</sup>, Allan B. Massie PhD, MHS<sup>2</sup>, Martin A. Makary MD, MPH\*<sup>1</sup>,  
6 Dorry L. Segev, MD PhD\*<sup>2</sup>

7 \*Senior authors contributed equally

8  
9 (1) Department of Surgery, Johns Hopkins University School of Medicine, Baltimore, MD.

10 (2) Department of Surgery, NYU Grossman School of Medicine, New York, NY.

11  
12  
13  
14  
15 Contact Information:

16 Dorry Segev, M.D., Ph.D.

17 Professor of Surgery

18 NYU Grossman School of Medicine

19 [dorry@nyulangone.org](mailto:dorry@nyulangone.org)

20

21 **Author Contributions:** Dr. Alejo had full access to all the data in the study and takes responsibility for  
22 the integrity of the data and the accuracy of the data analysis.

23 *Concept and Design:* Alejo, Chiang, Mitchell, Werbel, Massie, Makary, Segev.

24 *Acquisition, analysis, interpretation of data:* All authors.

25 *Drafting of the manuscript:* All authors.

26 *Critical revision of the manuscript:* Alejo, Chiang, Mitchell, Werbel, Massie, Makary, Segev.

27 *Statistical analysis:* Alejo, Chiang, Massie, Segev.

28 *Obtained funding:* Segev.

29 *Administrative, technical, or material support:* All authors.

30 *Supervision:* Massie, Makary, Segev.

31

32 **Conflict of Interest:** DL Segev has the following financial disclosures: consulting and speaking honoraria  
33 from Sanofi, Novartis, CLS Behring, Jazz Pharmaceuticals, Veloxis, Mallinckrodt, Thermo Fisher Scientific,  
34 Astra Zeneca, and Regeneron. The remaining authors of this manuscript have no financial disclosures or  
35 conflicts of interest to disclose.

36

37 **Funding/Support:** This work was supported by charitable donations from the Ben-Dov family. These  
38 authors received salary support from the following grants: T32DK007713 (Dr. Alejo), The ASTS Jonathan  
39 P. Fryer Resident Scientist Scholarship (Dr. Mitchell).

40

41 **Role of the Funder/Sponsor:** The funders had no role in the design and conduct of the study; collection,  
42 management, analysis, and interpretation of the data, preparation, review, or approval of the  
43 manuscript, and decision to submit the manuscript for publication.

44

45    **Acknowledgement:** We acknowledge the following individuals for their assistance with this study, none  
46    of whom were compensated for their contributions: Jake D. Kim, BS, and Carolyn N. Sidoti, BS, for data  
47    collection and study coordination (Department of Surgery, Johns Hopkins School of Medicine); Daniel S.  
48    Warren, PhD (Department of Surgery, Johns Hopkins School of Medicine), Amy Chang, MD, (Department  
49    of Surgery, Johns Hopkins School of Medicine) and Macey L. Levan, JD, PhD (Departments of Acute and  
50    Chronic Care, Johns Hopkins School of Nursing, and Surgery, Johns Hopkins School of Medicine) for  
51    administrative and scientific support.  
52

53 **Abstract**

54 As of 4/20/2022, approximately 23% of the eligible US population was unvaccinated. We studied COVID-  
55 19 infections during the Omicron (B.1.1.529) wave in unvaccinated US adults, stratified by pre-Omicron  
56 antibody levels. Anti-spike serologic testing was performed prior to the Omicron wave in the United  
57 States (9/23/21-11/5/21) and participants were surveilled to determine incident COVID-19. Only 12% of  
58 those who entered the wave with antibodies reported a test-confirmed COVID-19 infection, compared  
59 to 35% of those without antibodies prior to the Omicron wave. Effectiveness of these anti-RBD  
60 antibodies in this unvaccinated population was 67%. Among people with antibodies, titer did not appear  
61 to be associated with risk of test-confirmed Omicron infection.

62

63

64 As of 4/20/2022, approximately 23% of the eligible US population has not received at least one SARS-  
65 CoV-2-vaccine dose.[1] We recently reported that 99% of unvaccinated US adults who had a test-  
66 confirmed SARS-CoV-2 infection had detectable anti-RBD antibodies up to 20 months after their positive  
67 COVID-19 test.[2] However, whether these antibodies can be used as a clinical marker of protection  
68 against new variants is undescribed. To better understand protective correlates, we studied COVID-19  
69 infections during the Omicron (B.1.1.529) wave in unvaccinated US adults, stratified by pre-Omicron  
70 antibody levels.

71

## 72 Methods

73 Self-described healthy adults who reported never receiving a SARS-CoV-2 vaccine were recruited for this  
74 national cohort study between (9/11/2021-10/8/2021).[2] Anti-spike serologic testing was performed  
75 prior to the Omicron wave (9/23/21-11/5/21), and categories of antibody titers were created based on  
76 reported associations with neutralization.[3-4] Participants completed a follow-up questionnaire  
77 (1/19/2022-2/7/2022) about COVID-19 test status and symptoms (since 12/1/2021): tested positive for  
78 COVID-19, suspected COVID-19 but never tested positive, or no suspected infection or positive test, and  
79 classified symptoms as severe, moderate, mild, or none.

80

81 Population characteristics were compared using Fisher's exact test for categorical variables and  
82 Wilcoxon rank-sum test for continuous variables. All analyses were performed using Stata 17.0/SE. The  
83 study was approved by the Johns Hopkins institutional review board. Participants provided informed  
84 electronic consent.

85

## 86 Results

87 Of 843 unvaccinated adults with anti-RBD measured within two months preceding the Omicron wave,  
88 566 (67%) completed the follow-up survey between 1/19/2022-2/7/2022. 20 reported interval COVID-  
89 19 vaccination and were excluded. The median (interquartile range, IQR) age was 48 (37-59) years, 295  
90 (54%) were women, 453 (83%) were white, 203 (37%) reported having a test-confirmed COVID-19  
91 diagnosis before the Omicron wave, and 328 (60%) had anti-RBD antibodies before the Omicron wave.  
92 446 (82%) reported no regular public mask use since December 1, 2021. Participants with and without  
93 anti-RBD antibodies were similar with respect to age, sex, race, ethnicity, and mask use (Table).  
94  
95 35% of unvaccinated individuals without preexisting antibodies (anti-RBD<0.8 U/mL, n=218) reported  
96 test-confirmed COVID-19; an additional 12% reported suspected/unconfirmed COVID-19 during the  
97 Omicron wave. In contrast, 12% of unvaccinated individuals with preexisting antibodies (anti-RBD $\geq$ 0.8  
98 U/mL, n=328) reported test-confirmed COVID-19 and an additional 15% reported  
99 suspected/unconfirmed COVID-19 during the Omicron wave. Among those with anti-RBD 0.8-1000 U/mL  
100 (n=284), 12%/16% reported confirmed/suspected COVID-19, and among those with anti-RBD $\geq$ 1000  
101 U/mL (n=44), 9%/7% reported confirmed/suspected COVID-19 (Supplementary Figure).  
102  
103 Having antibodies was 67% effective against reporting test-confirmed COVID-19(35% vs 12% p<0.001).  
104 Among those with test-confirmed COVID-19 who answered symptom questions (n=115), those with  
105 antibodies reported shorter symptom duration than their antibody-negative counterparts (median[IQR]  
106 3.5 [3, 5] vs. 6 [3, 8] days, p=0.013). There was a higher proportion of antibody-negative participants (vs.  
107 positive) in the COVID-19-confirmed (38% vs 24%, p=0.15), and suspected/unconfirmed groups (22% vs.  
108 6%, p=0.06), but neither difference was statistically significant.

109

110 Discussion

111 In this national longitudinal study of incident COVID-19 among unvaccinated adults during the Omicron  
112 wave, only 12% of those who entered the wave with anti-RBD antibodies reported a test-confirmed  
113 COVID-19 infection, compared to 35% of those without antibodies prior to the Omicron wave.  
114 Effectiveness of these anti-RBD antibodies, presumably derived from previous infection, in this  
115 unvaccinated population was 67%. Recently, reduced vaccine efficacy against Omicron has been  
116 described among 4x-vaccinated Israelis, and the additional protection of a 4<sup>th</sup> dose peaked four weeks  
117 post-fourth dose and waned in later weeks.[4-5] Our results add valuable information to the discussion  
118 of vaccine versus infection-derived immune protection against Omicron.[6-7]

119  
120 Study limitations include lack of information about direct neutralization against Omicron (though anti-  
121 RBD correlation with neutralization is described), lack of viral sequencing (though follow-up occurred  
122 when Omicron became the dominant strain in the US), self-reported COVID-19 test results, limited  
123 availability of COVID-19 testing during the follow-up period which could lead to underreporting of  
124 COVID-confirmed cases, and survivor bias.[3]

125  
126 In conclusion, the presence of anti-RBD antibodies in an unvaccinated healthy adult (natural immunity)  
127 was associated with 23% decreased relative risk for COVID-19 reinfection and shortened symptom  
128 duration versus those without pre-existing anti-RBD antibodies during the Omicron wave. Among people  
129 with antibodies, titer did not appear to be associated with risk of test-confirmed Omicron infection,  
130 although our sample size for those  $\geq 1000$  U/mL may have been inadequate to detect such a difference  
131 in that range. It is important to note that while disease severity for hospitalized Omicron patients was  
132 somewhat lower for Omicron versus other variants, patients hospitalized with COVID-19 remain at  
133 substantial risk of critical illness and death. [8] Our findings shed some light on COVID protection among  
134 the unvaccinated-immune.

135   References

- 136   1. Centers for Disease Control and Prevention. COVID-19 Vaccinations in the United States. Accessed  
137       2/2/2022 [https://covid.cdc.gov/covid-data-tracker/#vaccinations\\_vacc-people-onedose-pop-5yr](https://covid.cdc.gov/covid-data-tracker/#vaccinations_vacc-people-onedose-pop-5yr)  
138   2. Alejo JL, Mitchell J, Chang A, et al. Prevalence and Durability of SARS-CoV-2 Antibodies Among  
139       Unvaccinated US Adults by History of COVID-19. JAMA. Published online February 03, 2022.  
140       doi:10.1001/jama.2022.1393  
141   3. Gilbert PB, Montefiori DC, McDermott AB, et al. Immune correlates analysis of the mRNA-1273  
142       COVID-19 vaccine efficacy clinical trial. Science. 2022;375(6576):43-50.  
143       doi:10.1126/science.abm3425  
144   4. Rössler A, Riepler L, Bante D, Von Laer D, Kimpel J. SARS-CoV-2 Omicron Variant Neutralization in  
145       Serum from Vaccinated and Convalescent Persons. New England Journal of Medicine. 2022.  
146       doi:10.1056/nejmc2119236.  
147   5. Bar-On YM, Goldberg Y, Mandel M, et al.. Protection by a Fourth Dose of BNT162b2 against Omicron  
148       in Israel. New England Journal of Medicine. 2022. doi:10.1056/nejmoa2201570.  
149   6. Luring AS, Tenforde MW, Chappell JD, et al.. Clinical severity of, and effectiveness of mRNA vaccines  
150       against, covid-19 from omicron, delta, and alpha SARS-CoV-2 variants in the United States:  
151       prospective observational study. BMJ. 2022:e069761. doi:10.1136/bmj-2021-069761.  
152   7. Accorsi EK, Britton A, Fleming-Dutra KE, et al.. Association Between 3 Doses of mRNA COVID-19  
153       Vaccine and Symptomatic Infection Caused by the SARS-CoV-2 Omicron and Delta Variants.  
154       JAMA. 2022. doi:10.1001/jama.2022.0470.  
155   8. Regev-Yochay G, Gonen T, Gilboa M, et al.. Efficacy of a Fourth Dose of Covid-19 mRNA Vaccine  
156       against Omicron. New England Journal of Medicine. 2022;386(14):1377-1380.  
157       doi:10.1056/nejmc2202542.  
158



159 **Table.** Participant demographics and clinical characteristics, by pre-Omicron anti-RBD level

|                                               | Total, No. (%)     | Anti-RBD Antibody |               | P value <sup>a</sup> |
|-----------------------------------------------|--------------------|-------------------|---------------|----------------------|
|                                               |                    | Negative          | Positive      |                      |
| No.                                           | 546                | 218               | 328           |                      |
| Age, median (IQR), y                          | 48 (37, 59)        | 48 (37, 62)       | 48 (37, 58)   | 0.41                 |
| Male                                          | 251 (46%)          | 104 (48%)         | 147 (45%)     | 0.54                 |
| Race <sup>b</sup>                             |                    |                   |               | 0.34                 |
| African American/Black                        | 7 (1%)             | 2 (1%)            | 5 (2%)        |                      |
| Asian                                         | 23 (4%)            | 10 (5%)           | 13 (4%)       |                      |
| White                                         | 453 (83%)          | 187 (86%)         | 266 (81%)     |                      |
| Other                                         | 63 (12%)           | 19 (9%)           | 44 (13%)      |                      |
| Hispanic <sup>b</sup>                         | 67 (12%) (n=543)   | 24 (11%)          | 43 (13%)      | 0.51                 |
| Mask use since Dec 1, 2021                    |                    |                   |               | 0.20                 |
| Yes                                           | 96 (18%)           | 44 (20%)          | 52 (16%)      |                      |
| No                                            | 446 (82%)          | 173 (79%)         | 273 (83%)     |                      |
| Declined to answer                            | 4 (1%)             | 1 (<1%)           | 3 (1%)        |                      |
| Anti-RBD median (IQR)                         | 34.6 (<0.8, 228.7) | <0.8 (<0.8, <0.8) | 168 (56, 499) | <0.001               |
| Prior COVID Infection                         |                    |                   |               |                      |
| Prior COVID confirmed                         | 203 (37%)          | 2 (1%)            | 201 (61%)     | <0.001               |
| Prior COVID unconfirmed                       | 183 (34%)          | 71 (33%)          | 112 (34%)     |                      |
| No prior COVID                                | 160 (29%)          | 145 (67%)         | 15 (5%)       |                      |
| Omicron-wave-confirmed                        | 115 (21%)          | 77 (35%)          | 38 (12%)      | <0.001               |
| Symptoms: severe or moderate                  | 38 (33%)           | 29 (38%)          | 9 (24%)       | 0.15                 |
| severe <sup>c</sup>                           | 1 (1%)             | 1 (1%)            | 0 (0%)        |                      |
| moderate <sup>c</sup>                         | 37 (32%)           | 28 (36%)          | 9 (24%)       |                      |
| Symptoms: mild or none                        | 77 (67%)           | 48 (62%)          | 29 (76%)      |                      |
| mild <sup>c</sup>                             | 74 (64%)           | 45 (58%)          | 29 (76%)      |                      |
| none <sup>c</sup>                             | 3 (3%)             | 3 (4%)            | 0 (0%)        |                      |
| Symptom duration median (IQR), d <sup>c</sup> | 5 (3, 7)           | 6 (3, 8)          | 3.5 (3, 5)    | 0.01                 |
| Omicron-wave-suspected                        | 76 (14%)           | 27 (12%)          | 49 (15%)      | <0.001               |
| Symptoms: severe or moderate                  | 9 (12%)            | 6 (22%)           | 3 (6%)        | 0.06                 |
| severe <sup>d</sup>                           | 0 (0%)             | 0 (0%)            | 0 (0%)        |                      |
| moderate <sup>d</sup>                         | 9 (12%)            | 6 (22%)           | 3 (6%)        |                      |
| Symptoms: mild or none                        | 67 (88%)           | 21 (77%)          | 46 (94%)      |                      |
| mild <sup>d</sup>                             | 64 (84%)           | 19 (70%)          | 45 (92%)      |                      |
| none <sup>d</sup>                             | 3 (4%)             | 2 (7%)            | 1 (2%)        |                      |
| Symptom duration median (IQR), d <sup>d</sup> | 4 (3, 5)           | 5 (3, 6)          | 4 (2, 5)      | 0.04                 |
| Omicron-wave-none                             | 355 (65%)          | 114 (52%)         | 241 (73%)     | <0.001               |

160

161 Abbreviation: RBD, receptor-binding domain.

162 <sup>a</sup> Fisher exact test used for categorical variables and Wilcoxon rank-sum test for continuous variables.

163 <sup>b</sup> Race and ethnicity were collected during recruitment to perform weighted random sampling among  
 164 the 3 groups for antibody testing. Participants could select from African-American/Black, Asian, White,  
 165 or other. Ethnicity was self-reported. Participants could select from Hispanic/Latino: yes/no.

166 <sup>c</sup> Among Omicron-wave-confirmed, N=115

167 <sup>d</sup> Among Omicron-wave-unconfirmed, N=76

168 **Figure. Distribution of self-reported COVID-19 infections after December 1, 2021 among unvaccinated**  
169 **US Adults, stratified by pre-Omicron wave anti-RBD antibody level.**

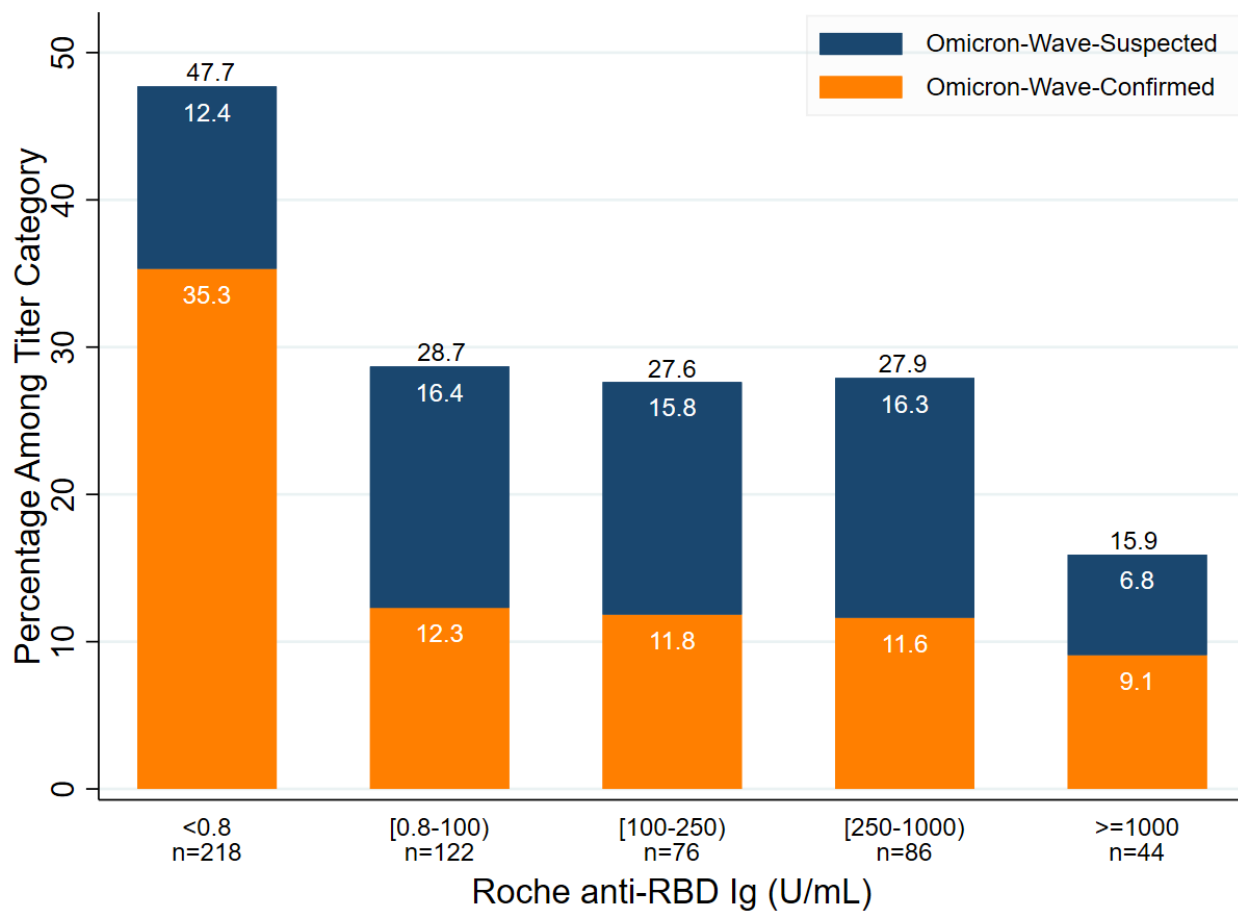

170  
171
